# Supplementary material for: Evolution of Cortical Neurogenesis in Amniotes Controlled by Robo Signaling Levels
Source: PubMed Central journal article supplement — Cell. 2018 Jul 26;174(3):590–606.e21. doi: 10.1016/j.cell.2018.06.007 (PMC6063992; doi:10.1016/j.cell.2018.06.007), 2018-07-26
Supplement: mmc1.pdf [file mmc1.pdf]

**Cell, Volume 174**

## **Supplemental Information**

### **Evolution of Cortical Neurogenesis in Amniotes**

#### **Controlled by Robo Signaling Levels**

**Adrián Cárdenas, Ana Villalba, Camino de Juan Romero, Esther Picó, Christina Kyrousi, Athanasia C. Tzika, Marc Tessier-Lavigne, Le Ma, Micha Drukker, Silvia Cappello, and Víctor Borrell**

**Table S1.** Related to STAR Methods.

| <b>Oligonucleotides</b>                                          |            |     |
|------------------------------------------------------------------|------------|-----|
| Crispr-mouse Dll1-1:<br>CACCGTAACCGCGGGTGCACGCCGG                | This paper | N/A |
| Crispr-mouse Dll1-2:<br>AAACCGGCGTGCACCCGCGGTTAC                 | This paper | N/A |
| Crispr-human Dll1-1:<br>CACCATATAAAGAACCGCGGCCTT                 | This paper | N/A |
| Crispr-human Dll1-2:<br>AAACAAGGCCGCGGTTCTTTATATC                | This paper | N/A |
| qRT-RNA primer Robo1-Fw:<br>CCTTCAGACCTGATCGTCTCC                | This paper | N/A |
| qRT-RNA primer Robo1-Rv:<br>TGAGCGCGGGTCATCTTTG                  | This paper | N/A |
| qRT-RNA primer Robo2-Fw:<br>CTTTGAACGACCCACATTTCTCA              | This paper | N/A |
| qRT-RNA primer Robo2-Rv:<br>TCTCAGCGTGTAGTCATCTTTGA              | This paper | N/A |
| qRT-RNA primer ms18S-Fw:<br>CGGCTACCACATCCAAGGAA                 | This paper | N/A |
| qRT-RNA primer ms18S-Fw:<br>GCTGGAATTACCGCGGCT                   | This paper | N/A |
| qRT-RNA primer ckROBO1-Fw:<br>AGAAGATTTCCACCTCG                  | This paper | N/A |
| qRT-RNA primer ckROBO1-Rv:<br>CTTGCCACGCAGACATAG                 | This paper | N/A |
| qRT-RNA primer ckGAPDH –Fw:<br>GTGGTGCTAAGCGTGTTATCATC           | This paper | N/A |
| qRT-RNA primer ckGAPDH –Rv:<br>GGCAGCACCTCTGCCATC                | This paper | N/A |
| ISH: snRobo1-Fw: TCATCTCATTGATTTTGTGTC                           | This paper | N/A |
| ISH: snRobo1-Rv CAAGATATGAAATCCGTGATG                            | This paper | N/A |
| ISH: snRobo2-Fw: TGGCACTCCTGGAAACCTAC                            | This paper | N/A |
| ISH: snRobo2-Rv CAGTTCATGGATGCTGTTGG                             | This paper | N/A |
| ISH: snDll1-Fw: TACCGCTTTGTGTGTGATG                              | This paper | N/A |
| ISH: snDll1-Rv GCACCAAATTGTAATCCACTG                             | This paper | N/A |
| Mouse Dll1 Crispr validation primer Fw:<br>GATATAGCCCCGATGAATGC; | This paper | N/A |
| Mouse Dll1 Crispr validation primer Rv:<br>AGAGAGCCCAGATGTTTCAGC | This paper | N/A |
| Human Dll1 Crispr validation primer Fw:<br>TGGGAGGAAGGAGGAAAACG, | This paper | N/A |
| Human Dll1 Crispr validation primer Rv:<br>AGCAGCCCCTTCTTGTTGAC  | This paper | N/A |
